# Supplementary material for: Controllable synthesis of self-templated hierarchical Ni3S2@N-doped carbon for enhanced oxygen evolution reaction
Source: Royal Society of Chemistry journal article supplement (doi:10.1039/d1ma00229e), 2021-01-01
Supplement: d1ma00229e1.pdf [file d1ma00229e1.pdf]

# **Controllable synthesis of self-templated hierarchical Ni<sub>3</sub>S<sub>2</sub>@N-doped carbon for enhanced oxygen evolution reaction**

Shuai Wang<sup>1</sup>, Zheng Lu<sup>1</sup>, Yuan Fang<sup>1</sup>, Tian Zheng<sup>2</sup>, Zidong Zhang<sup>1</sup>, Wenjian Wang<sup>1</sup>, Rui Zhao<sup>1,\*</sup>, and Weidong Xue<sup>1,\*</sup>

<sup>1</sup> School of Materials and Energy, University of Electronic Science and Technology of China,  
Chengdu 610054, China

<sup>2</sup> State Key Laboratory of Environment-Friendly Energy Materials, Southwest University of  
Science and Technology, Mianyang 621010, China

---

\*Corresponding author. E-mail: ruizhao@uestc.edu.cn (R. Zhao); xuewd@uestc.edu.cn (W. Xue)

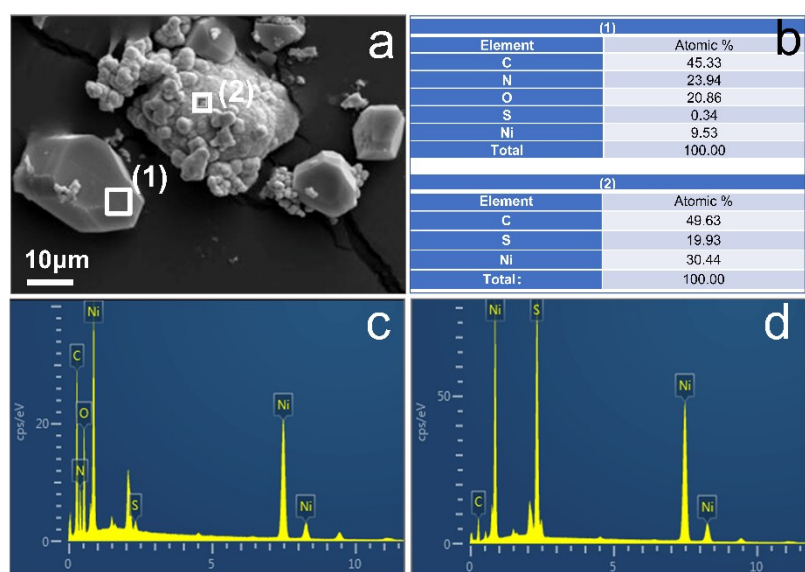

**Figure S1** SEM image (a), element analysis (b) and EDS spectra (b, d), of H-Ni<sub>3</sub>S<sub>2</sub>@NC-3/NF for polyhedron (1) and microsphere (2), respectively.

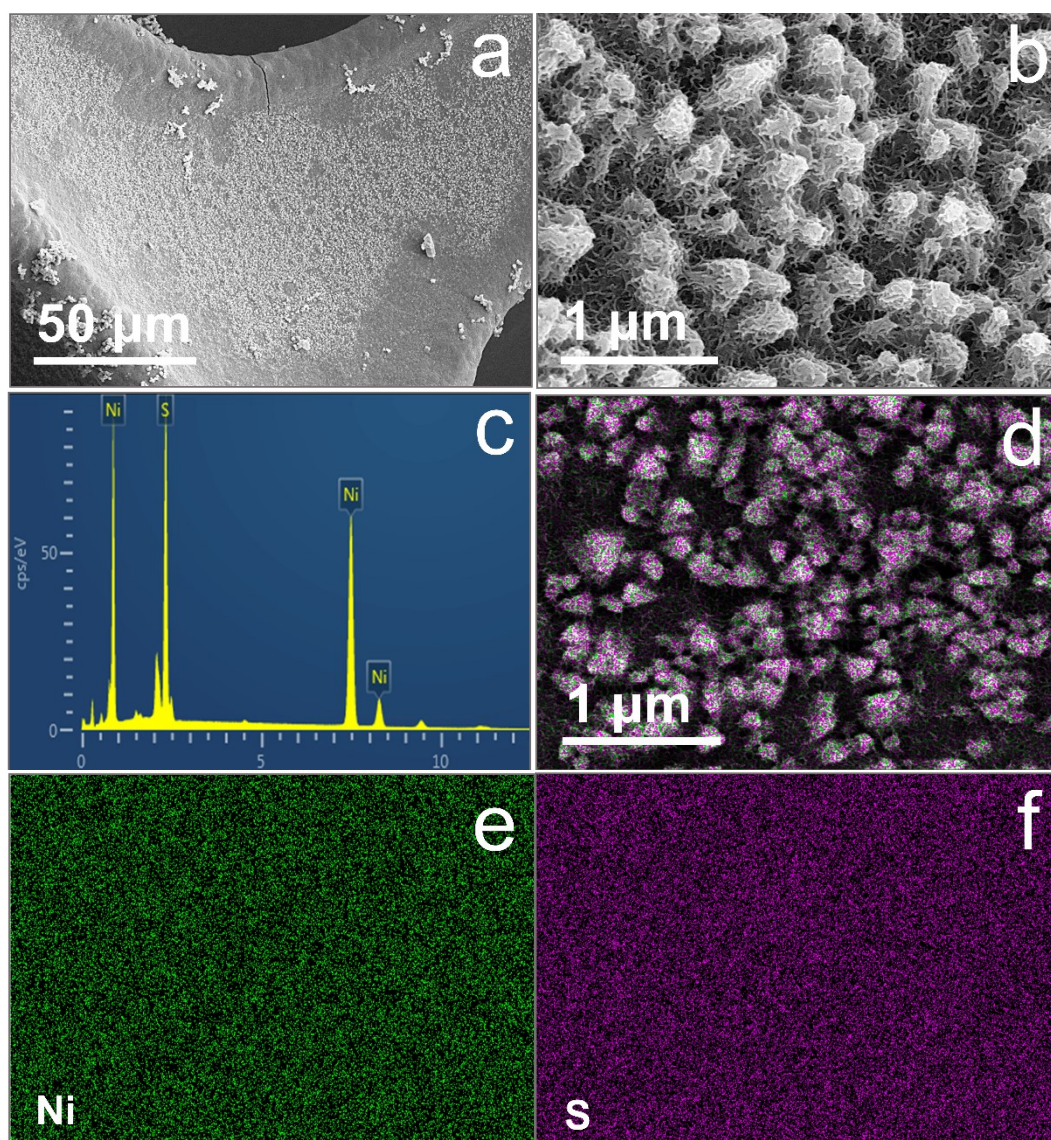

**Figure S2** SEM images (a, b), EDS spectrum (c), and elemental mapping images of total (d), Ni (e), and S (f) for nanocoral-like  $\text{Ni}_3\text{S}_2/\text{NF}$ .



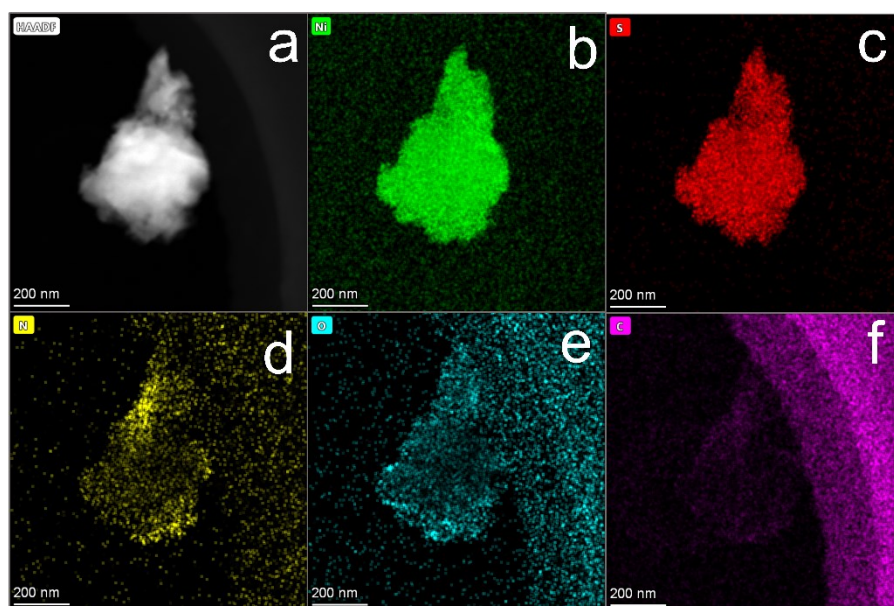

**Figure S3** HAADF image (a), and elemental mapping images of Ni (b), S (c), N (d), O (e), and C (f) for H-Ni<sub>3</sub>S<sub>2</sub>@NC-3/NF.

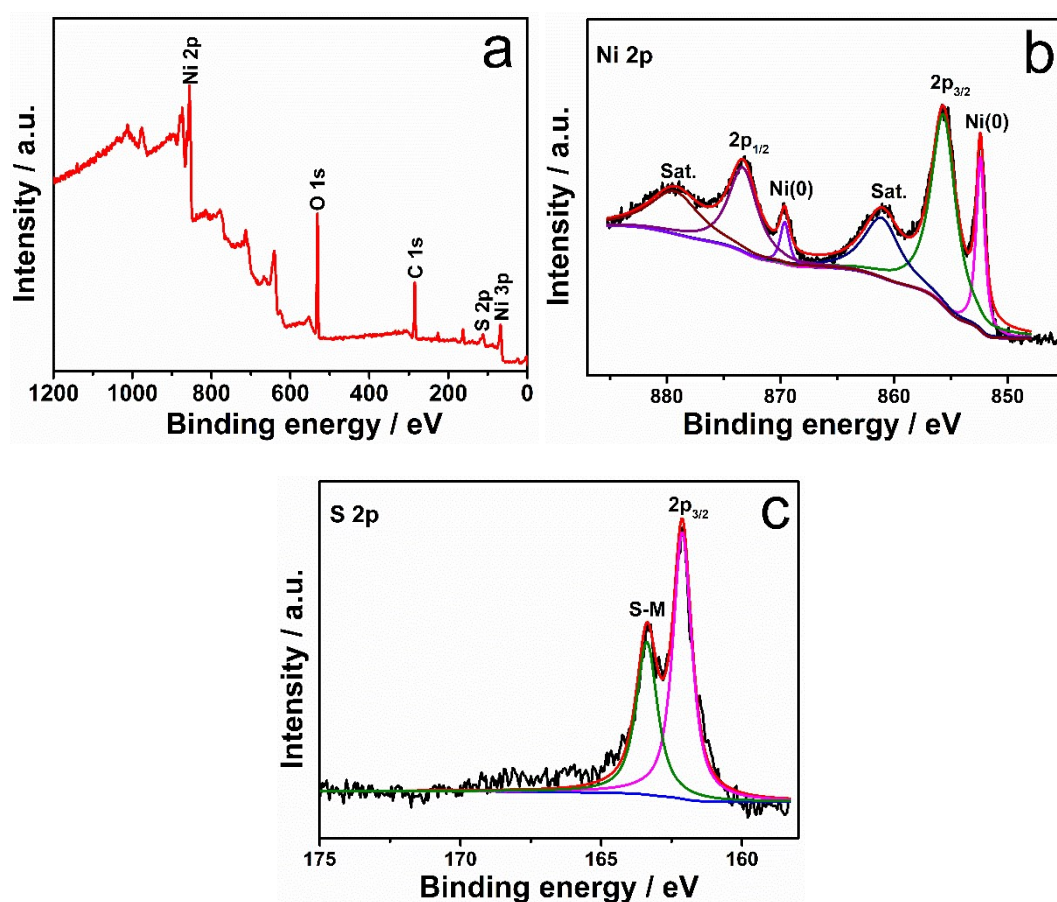

**Figure S4** XPS spectra of XPS survey (a), Ni 2p (b), and S 2p (c) for nanocoral-like Ni<sub>3</sub>S<sub>2</sub>/NF.

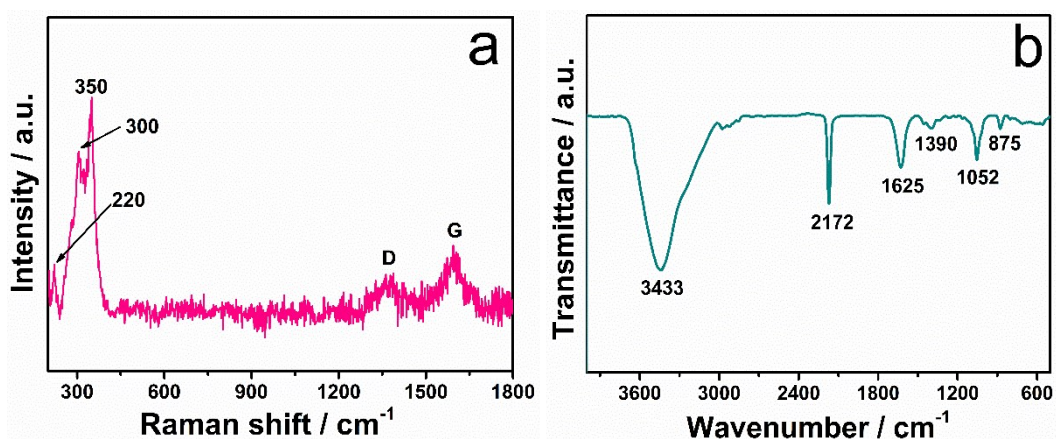

**Figure S5** Raman (a) and FTIR spectrum (b) of H-Ni<sub>3</sub>S<sub>2</sub>@NC-3/NF.

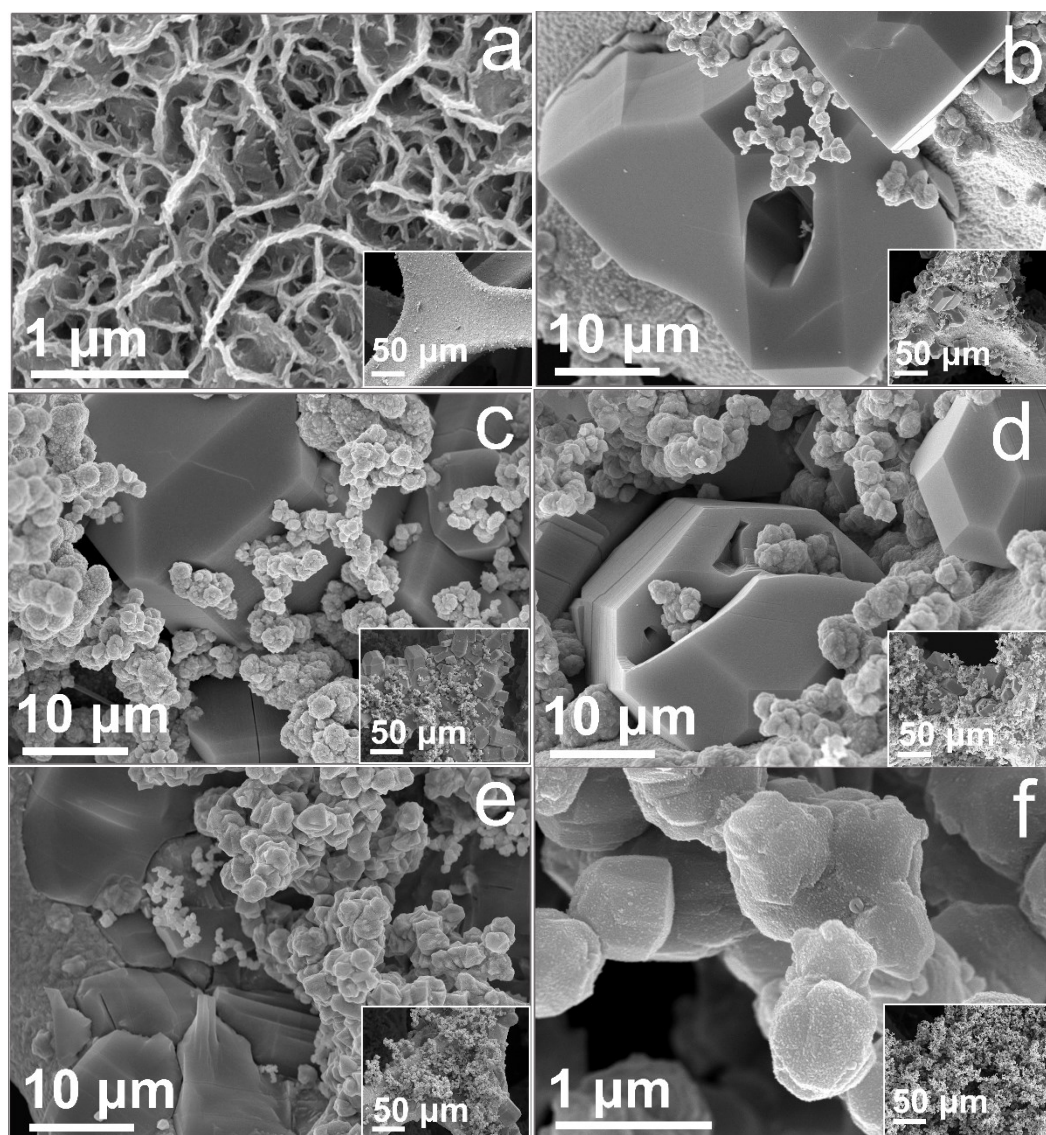

**Figure S6** SEM images of H-Ni<sub>3</sub>S<sub>2</sub>@NC-3/NF prepared at 140 °C (a), 150 °C (b), 160 °C (c), 170 °C (d), 180 °C (e), and 200 °C (f) for 8 h.



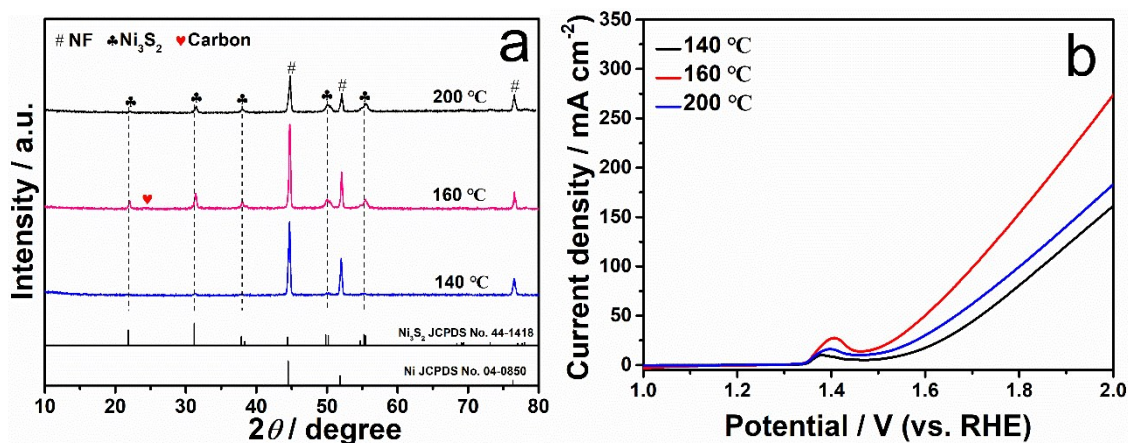

**Figure S7** XRD patterns (a) and polarization curves (b) of H- $\text{Ni}_3\text{S}_2$ @NC-3/NF obtained at 140 °C, 160 °C, and 200 °C for 8 h.

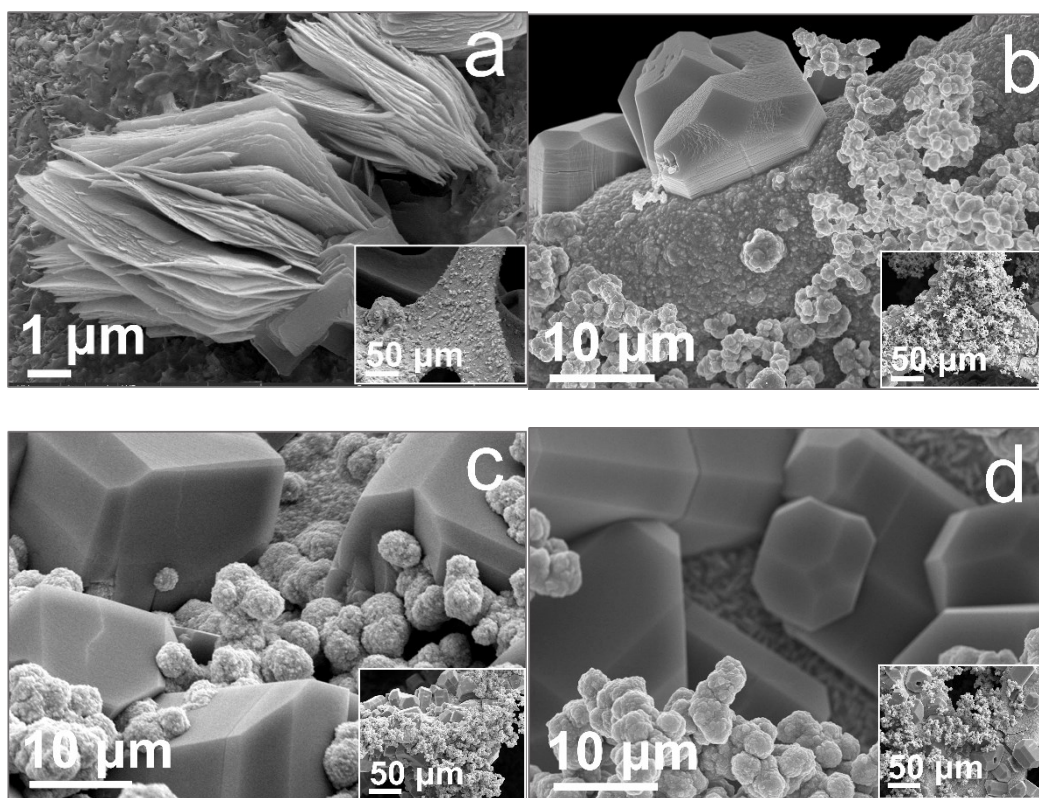

**Figure S8** SEM images of H- $\text{Ni}_3\text{S}_2$ @NC-3/NF prepared at 160 °C for 2 h (a), 4 h (b), 14 h (c), and 20 h (d).

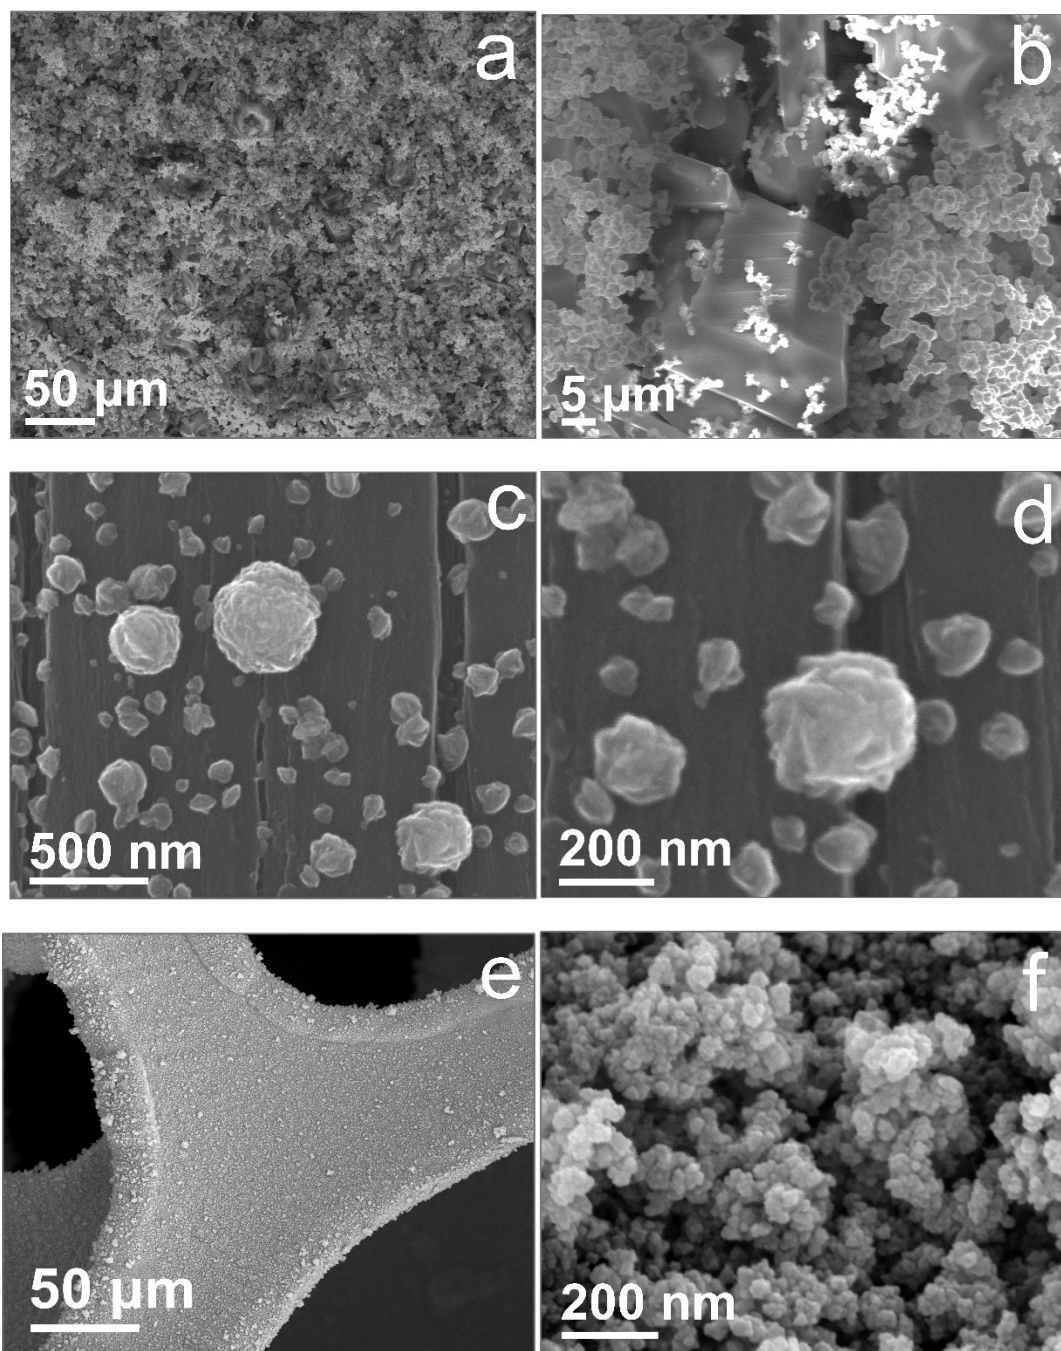

**Figure S9** SEM images of H-Ni<sub>3</sub>S<sub>2</sub>/NP (a, b), Ni<sub>3</sub>S<sub>2</sub>/CC (c, d), and Ni<sub>3</sub>S<sub>2</sub>/NF nanoparticle treated with Na<sub>2</sub>S (e, f).



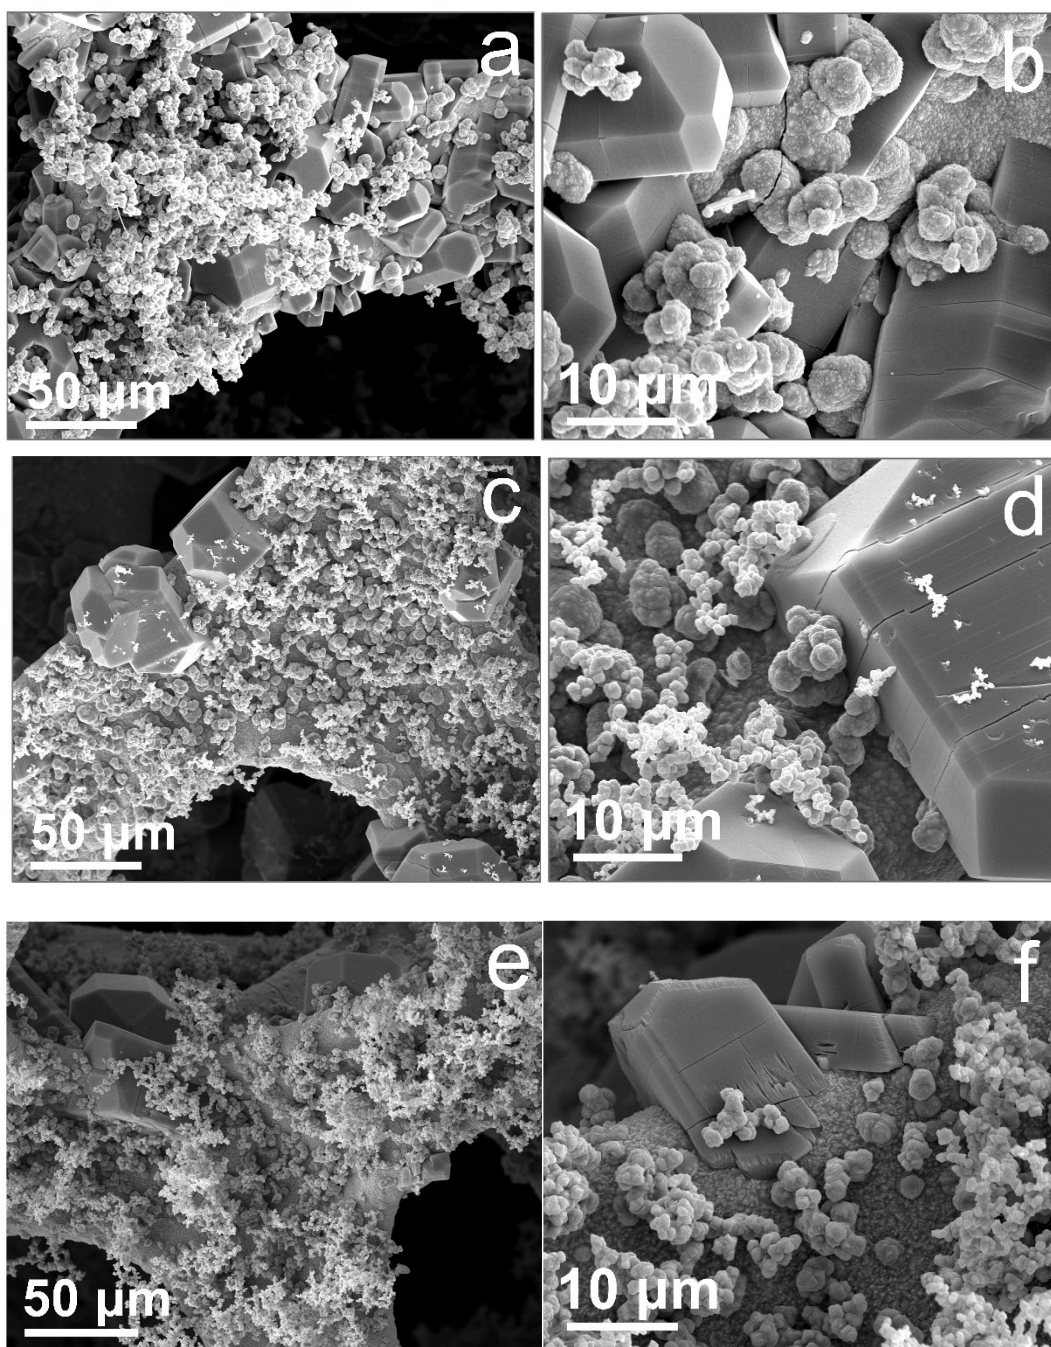

**Figure S10** SEM images of H-Ni<sub>3</sub>S<sub>2</sub>@NC-3/NF prepared with different Ni<sup>2+</sup> precursors of Ni(NO<sub>3</sub>)<sub>2</sub> · 6H<sub>2</sub>O (a, b), NiSO<sub>4</sub> · 6H<sub>2</sub>O (c, d), and Ni(CH<sub>3</sub>COO)<sub>2</sub> · 4H<sub>2</sub>O (e, f) at 160 °C for 8 h.



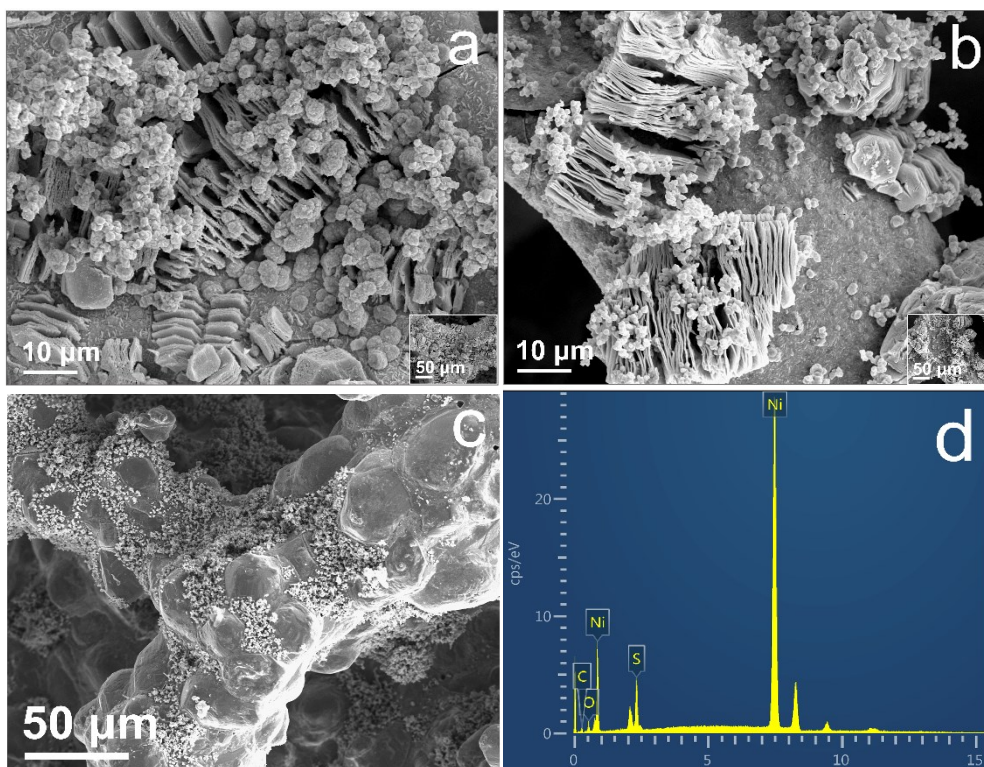

**Figure S11** SEM images of A-Ni<sub>3</sub>S<sub>2</sub>/C-500 (a), A-Ni<sub>3</sub>S<sub>2</sub>/C-600 (b), A-Ni<sub>3</sub>S<sub>2</sub>/C-700 (c), and EDS spectrum of A-Ni<sub>3</sub>S<sub>2</sub>/C-500 (d).

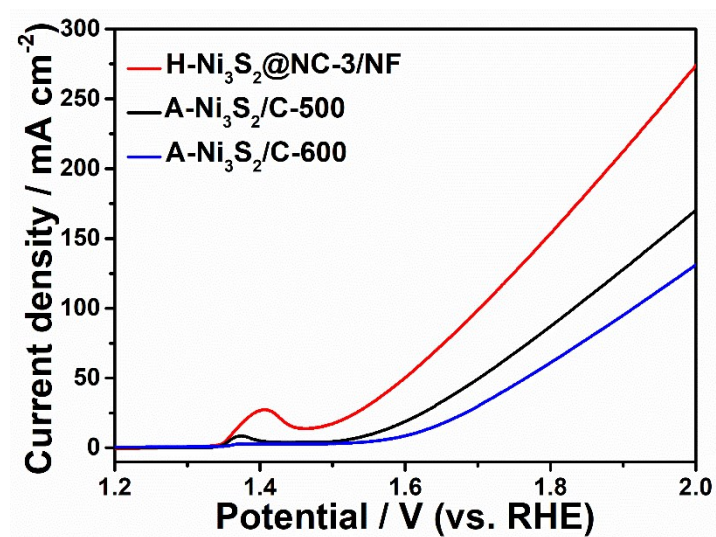

**Figure S12** Polarization curves of H-Ni<sub>3</sub>S<sub>2</sub>@NC-3/NF, A-Ni<sub>3</sub>S<sub>2</sub>/C-500 and A-Ni<sub>3</sub>S<sub>2</sub>/C-600.

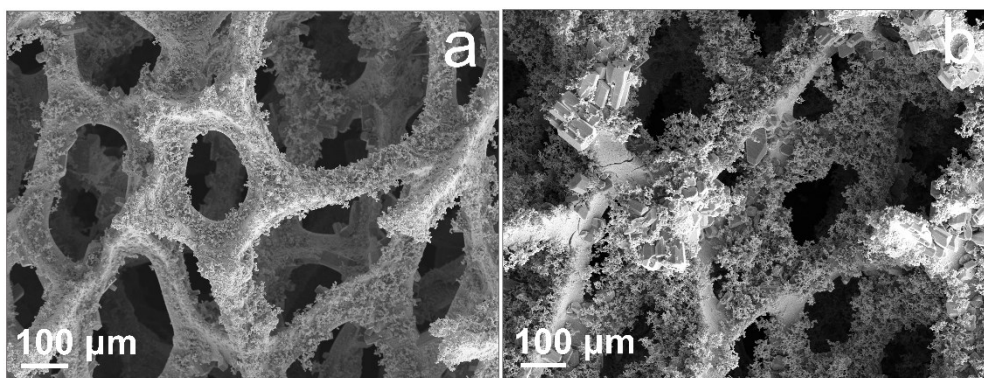

**Figure S13** SEM images of H-Ni<sub>3</sub>S<sub>2</sub>@NC-1/NF (a) and H-Ni<sub>3</sub>S<sub>2</sub>@NC-5/NF (b).

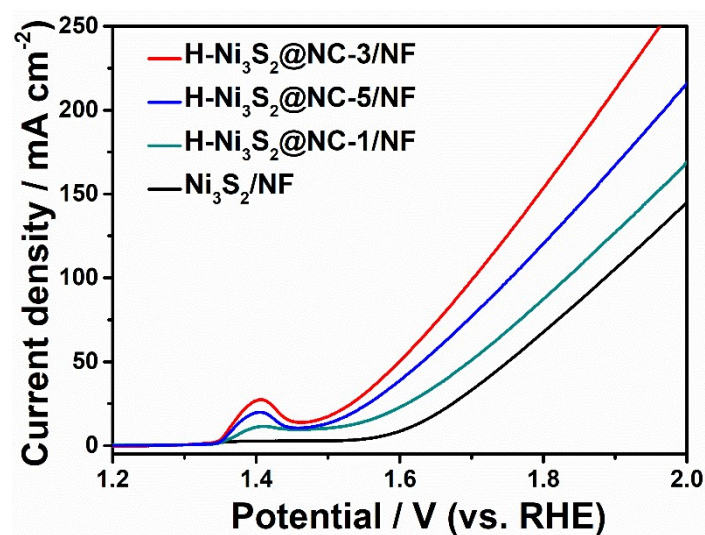

**Figure S14** Polarization curves of nanocoral-like Ni<sub>3</sub>S<sub>2</sub>/NF, H-Ni<sub>3</sub>S<sub>2</sub>@NC-1/NF, H-Ni<sub>3</sub>S<sub>2</sub>@NC-3/NF and H-Ni<sub>3</sub>S<sub>2</sub>@NC-5/NF.

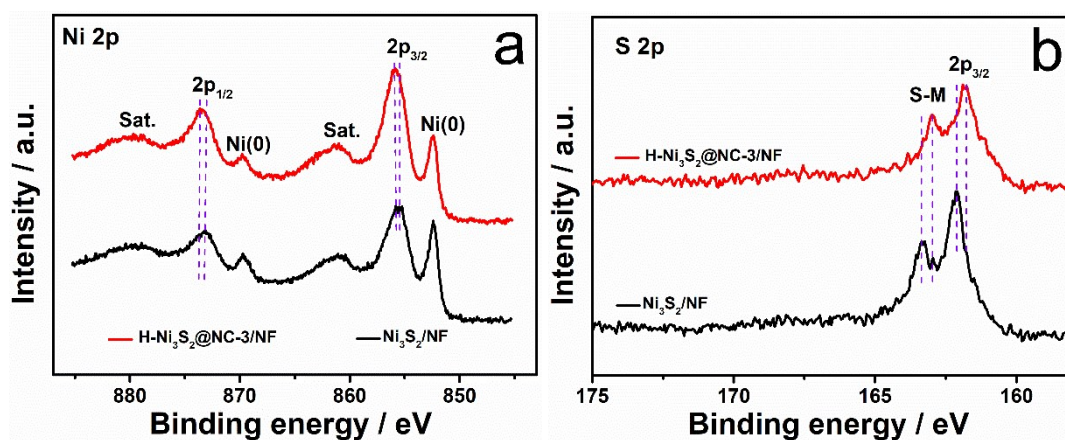

**Figure S15** XPS spectra of Ni 2p (a) and S 2p (b) for H-Ni<sub>3</sub>S<sub>2</sub>@NC-3/NF and nanocoral-like Ni<sub>3</sub>S<sub>2</sub>/NF.



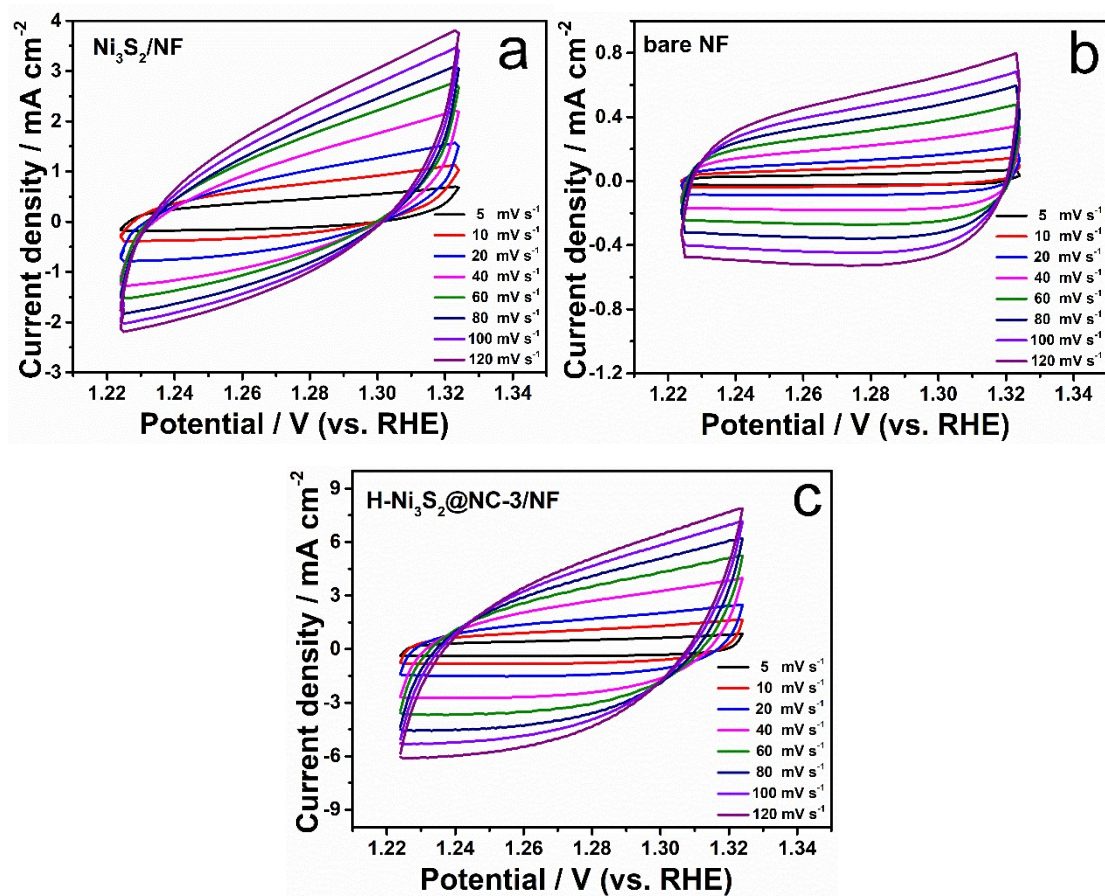

**Figure S16** CV curves of nanocoral-like Ni<sub>3</sub>S<sub>2</sub>/NF (a), bare NF(b) and H-Ni<sub>3</sub>S<sub>2</sub>@NC-3/NF (c) at different scan rates of 5-120 mV s<sup>-1</sup>.

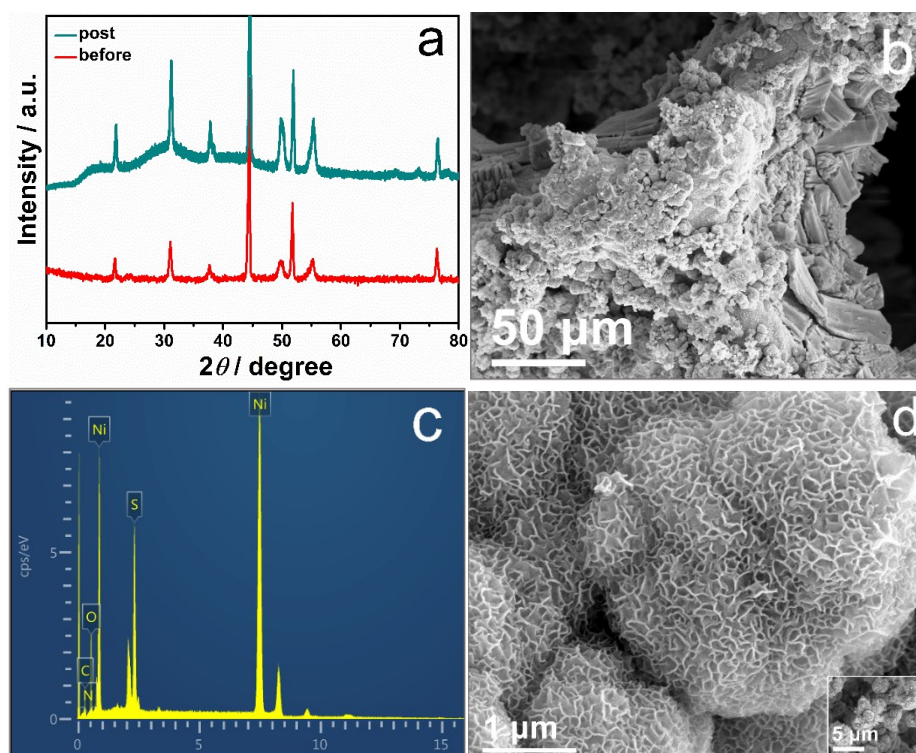

**Figure S17** XRD patterns (a), SEM images (b, d), and EDS spectrum (c) of H-Ni<sub>3</sub>S<sub>2</sub>@NC-3/NF after long-term test.

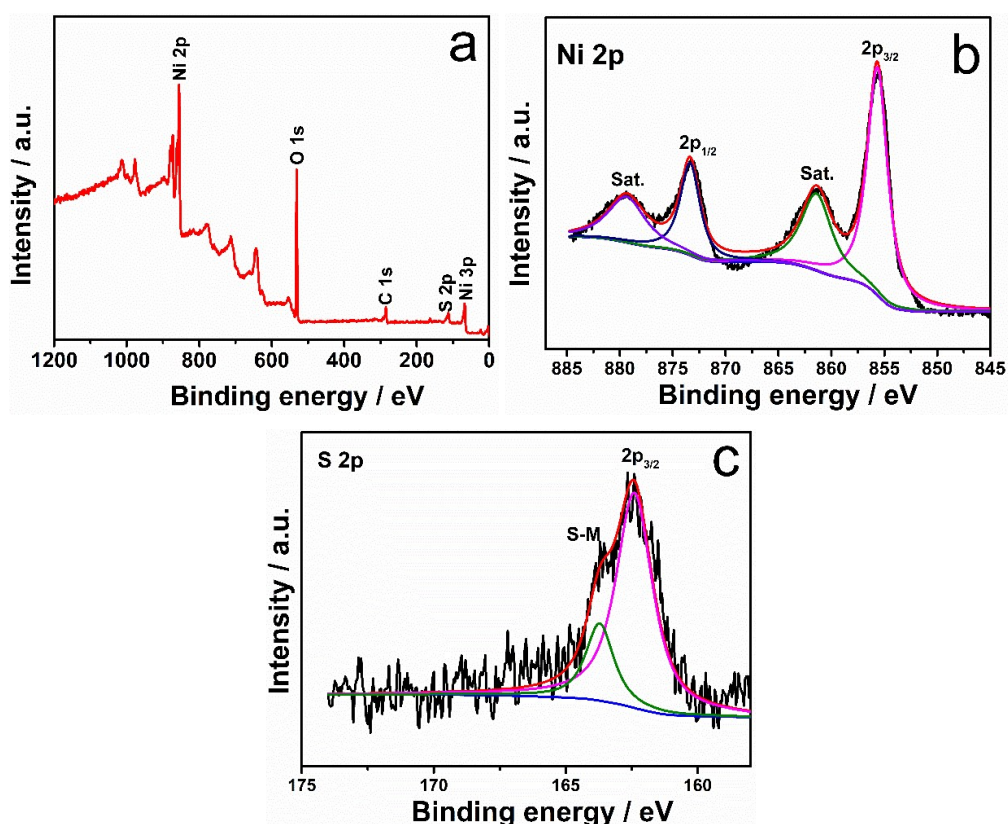

**Figure S18** XPS spectra of survey spectrum (a), Ni 2p (b), and S 2p (c) of H-Ni<sub>3</sub>S<sub>2</sub>@NC-3/NF post OER.
